# Supplementary material
Source: publisher site journal article supplement (https://www.dovepress.com/get_supplementary_file.php?f=330936.docx)
Supplement: Supplementary file 1 [file get_supplementary_file.php]

## SUPPLEMENTARY MATERIAL

**Treatment Goals in Schizophrenia: a Real-world Survey of Patients, Psychiatrists, and Caregivers in the United States, With an Analysis of Current Treatment (Long-acting Injectable vs. Oral Antipsychotics) and Goal Selection**

Heather M. Fitzgerald, PharmDa; Jason Shepherd, BAb; Hollie Bailey, BScb; Mia Berry, BScb; Jack Wright, MAb; Maxine Chen, PhDc*

aLundbeck LLC, Deerfield, Illinois

bAdelphi Real World, Bollington, UK
cOtsuka Pharmaceutical & Commercial Development, Inc., Princeton, New Jersey

**Corresponding author:* Maxine Chen, PhD, Otsuka Pharmaceutical & Commercial Development, Inc., 508 Carnegie Center, Princeton, New Jersey 08540 (**tel:** 609-524-6788; e**mail:** Maxine.Chen@Otsuka-US.com).

**Supplementary Table 1. Most and Least Important Patient Treatment Goals by Responder Groupa**

| Most Important Treatment Goals, n (%) | Patient Reported  (n = 542) | Psychiatrist Reported  (n = 1161) | Caregiver Reported  (n = 130) |
| --- | --- | --- | --- |
| Decrease in disease symptoms (hallucinations and/or delusions) | 347 (64) | 734 (63) | 88 (68) |
| Decrease in hospitalizations for relapse | 114 (21) | 471 (41) | 50 (38) |
| Less anxious and more relaxed (able to handle stressful situations) | 162 (30) | 364 (31) | 39 (30) |
| Think more clearly (able to concentrate) | 257 (47) | 334 (29) | 38 (29) |
| Increased ability to take care of self (being independent, able to cook, clean, etc) | 100 (18) | 330 (28) | 36 (28) |
| Improved interaction and communication with others | 121 (22) | 283 (24) | 32 (25) |
| Increased interest in work, studies, and/or hobbies (daily activities) | 135 (25) | 258 (22) | 16 (12) |
| Spend more time with family and friends (socialize more often) | 86 (16) | 207 (18) | 37 (28) |
| Less weight gain | 87 (16) | 134 (12) | 17 (13) |
| Fuller range of happy and sad emotions (feel more deeply) | 164 (30) | 120 (10) | 30 (23) |
| Less restlessness or urges to move (less unrest or feeling fidgety) | 55 (10) | 115 (10) | 12 (9) |
| Less fatigue or feeling slowed down (missing energy) | 56 (10) | 91 (8) | 9 (7) |
| Less sexual problems (less sexual dysfunction or intimacy issues) | 59 (11) | 42 (4) | 5 (4) |
| Least Important Treatment Goals, n (%) | Patient Reported  (n = 465) | Psychiatrist Reported  (n = 1161) | Caregiver Reported  (n = 115) |
| Less sexual problems (less sexual dysfunction or intimacy issues) | 202 (43) | 689 (59) | 51 (44) |
| Less weight gain | 203 (44) | 444 (38) | 44 (38) |
| Less fatigue or feeling slowed down (missing energy) | 110 (24) | 373 (32) | 37 (32) |
| Less restlessness or urges to move (less unrest or feeling fidgety) | 172 (37) | 353 (30) | 34 (30) |
| Spend more time with family and friends (socialize more often) | 89 (19) | 316 (27) | 20 (17) |
| Fuller range of happy and sad emotions (feel more deeply) | 77 (17) | 257 (22) | 15 (13) |
| Increased interest in work, studies, and/or hobbies (daily activities) | 70 (15) | 207 (18) | 25 (22) |
| Increased ability to take care of self (being independent, able to cook, clean, etc) | 69 (15) | 187 (16) | 23 (20) |
| Less anxious and more relaxed (able to handle stressful situations) | 61 (13) | 187 (16) | 23 (20) |
| Improved interaction and communication with others | 83 (18) | 172 (15) | 23 (20) |
| Think more clearly (able to concentrate) | 50 (11) | 127 (11) | 10 (9) |
| Decrease in hospitalizations for relapse | 118 (25) | 111 (10) | 20 (17) |
| Decrease in disease symptoms (hallucinations and/or delusions) | 30 (6) | 60 (5) | 6 (5) |

aRespondents were instructed to select the top 3 most important and top 3 least important goals for patients. Goals are presented in decreasing order of response rate for the psychiatrist group, ie, the goal most commonly selected by psychiatrists is presented in the *top row;* psychiatrist-reported data reflect the percentage of patients for whom the goal was identified.

**Supplementary Table 2. Patient Treatment Goals Met or Not Met by Current Medication by Responder Groupa**

| Treatment Goals Met by Current Medication, n (%) | Patient Reported  (n = 530) | Caregiver Reported  (n = 132) |
| --- | --- | --- |
| Decrease in disease symptoms (hallucinations and/or delusions) | 363 (68) | 93 (70) |
| Think more clearly (able to concentrate) | 208 (39) | 38 (29) |
| Decrease in hospitalizations for relapse | 176 (33) | 54 (41) |
| Less anxious and more relaxed (able to handle stressful situations) | 155 (29) | 36 (27) |
| Fuller range of happy and sad emotions (feel more deeply) | 132 (25) | 29 (22) |
| Increased interest in work, studies, and/or hobbies (daily activities) | 106 (20) | 20 (15) |
| Increased ability to take care of self (being independent, able to cook, clean, etc) | 104 (20) | 30 (23) |
| Improved interaction and communication with others | 88 (17) | 28 (21) |
| Spend more time with family and friends (socialize more often) | 77 (15) | 33 (25) |
| Less restlessness or urges to move (less unrest or feeling fidgety) | 71 (13) | 6 (5) |
| Less weight gain | 53 (10) | 10 (8) |
| Less fatigue or feeling slowed down (missing energy) | 50 (9 ) | 10 (8) |
| Less sexual problems (less sexual dysfunction or intimacy issues) | 32 (6) | 4 (3) |
| Treatment Goals Not Met by Current Medication, n (%) | Patient Reported  (n = 465) | Caregiver Reported  (n = 113) |
| Less weight gain | 203 (44) | 29 (26) |
| Less sexual problems (less sexual dysfunction or intimacy issues) | 202 (43) | 29 (26) |
| Less restlessness or urges to move (less unrest or feeling fidgety) | 172 (37) | 22 (19) |
| Decrease in hospitalizations for relapse | 118 (25) | 11 (10) |
| Less fatigue or feeling slowed down (missing energy) | 110 (24) | 28 (25) |
| Spend more time with family and friends (socialize more often) | 89 (19) | 28 (25) |
| Improved interaction and communication with others | 83 (18) | 30 (27) |
| Fuller range of happy and sad emotions (feel more deeply) | 77 (17) | 25 (22) |
| Increased interest in work, studies, and/or hobbies (daily activities) | 70 (15) | 27 (24) |
| Increased ability to take care of self (being independent, able to cook, clean, etc) | 69 (15) | 24 (21) |
| Less anxious and more relaxed (able to handle stressful situations) | 61 (13) | 26 (23) |
| Think more clearly (able to concentrate) | 50 (11) | 34 (30) |
| Decrease in disease symptoms (hallucinations and/or delusions) | 30 (6) | 9 (8) |

aRespondents were instructed to select up to 3 goals; goals are presented in decreasing order of response rate for the patient group, ie, the goal most commonly selected by patients is presented in the *top row*.
